# Supplementary material
Source: Springer Nature journal article supplement (https://www.springermedizin.de/resource/supplementary/12888_2013_1399_MOESM4_ESM.pdf/9480130)
Supplement: MOESM4 [file 9480130]

# DATA PROCESSING

## STEP I

Normalization and background correction using frozen robust multichip average (fRMA)

## OUTPUT

**$m \times n$  Matrix**  
 **$m$  Probesets** ( $\log_2$ )  
normalized  
intensities for  **$n$**   
samples

## STEP II

Principal components analysis (PCA) and clustering to visualize and identify outlier samples

Filtered  **$n - y$**   
samples

## STEP III

Determine and filter present/absent/marginal calls using approach of Presence Absence calls with Negative Probesets (PANP)

Filtered  **$m - x$**   
probesets

## STEP IV

Perform surrogate variable analysis (SVA) to identify systematic measured and unmeasured sources of heterogeneity; use linear regression of probeset intensities with SVA covariates to obtain residuals with sources of heterogeneity removed

**$(m - \mu) \times n$  Matrix**  
Probeset level  
residual Intensities  
after correcting for  
expression  
heterogeneity

## STEP V

Assign probesets to Refseq genes  **$G$** , using approach of JetSet

**$G \times n$  Matrix**  
Gene level residual  
intensities

# DATA ANALYSIS

Analyze gene level data from all studies together (mega-analysis) using **random effects linear regression with crossed random effects** (lme4 package in R) to account for within study and within subject correlation (when subjects are used across multiple studies)
